# Supplementary material for: A proposal of a new evaluation framework towards implementation of genetic tests
Source: PLoS One. 2019 Aug 5;14(8):e0219755. doi: 10.1371/journal.pone.0219755 (PMC6681956; doi:10.1371/journal.pone.0219755)
Supplement: S3 File — (XLS) [file pone.0219755.s003.xls]

## Sheet: Delph_survey_round1
ID	Test_condition_overview	Analytic_v	Clinical_v	Clinical_u	Organizational	Delivery_models	Economic evaluation	ELSI
1	4	5	4	4	3	3	4	5
2	5	5	5	5	5	5	4	4
3	5	5	5	5	4	3	3	3
4	5	5	5	5	5	5	4	4
5	4	5	5	5	4	5	5	4
6	5	5	5	4	3	3	5	5
7	5	5	5	5	4	4	4	4
8	3	3	4	5	5	4	4	4
9	5	5	5	5	4	4	5	4
10	4	5	4	5	5	4	5	4
11	5	5	5	5	4	5	5	4
12	4	5	5	5	4	4	4	5
13	5	5	5	5	4	4	4	5
14	5	5	5	5	4	4	4	5
15	5	5	5	5	5	4	4	5
16	4	5	5	5	4	5	4	5
17	5	5	5	5	4	5	4	5
18	5	5	5	5	3	5	5	5
19	4	5	3	3	4	5	5	5
20	5	5	5	5	5	5	5	5
21	5	5	5	5	5	5	5	5
22	5	5	5	5	5	5	3	5
23	5	5	5	5	4	3	4	5
24	5	5	5	5	4	4	4	5
25	5	5	5	5	4	4	4	5
26	5	5	5	5	4	5	4	5
27	5	5	5	5	5	5	4	5
28	5	5	.	5	4	4	5	5
29	5	5	5	5	5	5	5	5
30	5	5	5	5	5	5	5	5
31	5	5	5	5	5	5	5	5
32	5	5	5	5	5	5	5	5
33	5	5	5	5	5	5	5	5
34	5	5	5	5	5	5	5	5
35	5	5	5	5	5	5	5	5
36	5	5	5	5	5	5	5	5
37	5	5	5	5	5	5	5	5
38	5	5	5	5	5	5	5	5
39	5	5	5	5	5	5	5	5
40	5	5	5	5	3	.	3	.
41	5	5	5	.	5	5	5	5
42	5	5	5	5	3	5	4	4
43	5	5	5	5	4	4	4	4

## Sheet: Delphi_survey_round2
id	Patient_perspec
1	1
2	1
3	2
4	3
5	3
6	3
7	3
8	3
9	3
10	3
11	3
12	4
13	4
14	4
15	4
16	4
17	4
18	4
19	4
20	4
21	4
22	4
23	5
24	5
25	5
26	5
27	5
28	5
29	5
30	5
31	5
32	5
33	5
